# Supplementary material
Source: PubMed Central journal article supplement (PMC3976043)
Supplement: NIHMS561976-supplement-Frequency_distributions_in_mice_.pdf [file NIHMS561976-supplement-Frequency_distributions_in_mice_.pdf]

## Supplementary Online Content

Kocarnik JM, Fullerton SM. Returning pleiotropic results from genetic testing to patients and research participants. *JAMA*. doi:10.1001/jama.2014.369

**eFigure.** Frequency Distributions of the Degree of Pleiotropy Observed in the Genes Listed in the ACMG Policy Statement and a Pleiotropy Screen in Mice

This supplementary material has been provided by the authors to give readers additional information about their work.

**eFigure 1. Frequency distributions of the degree of pleiotropy observed in the genes listed in the ACMG policy statement and a pleiotropy screen in mice.**

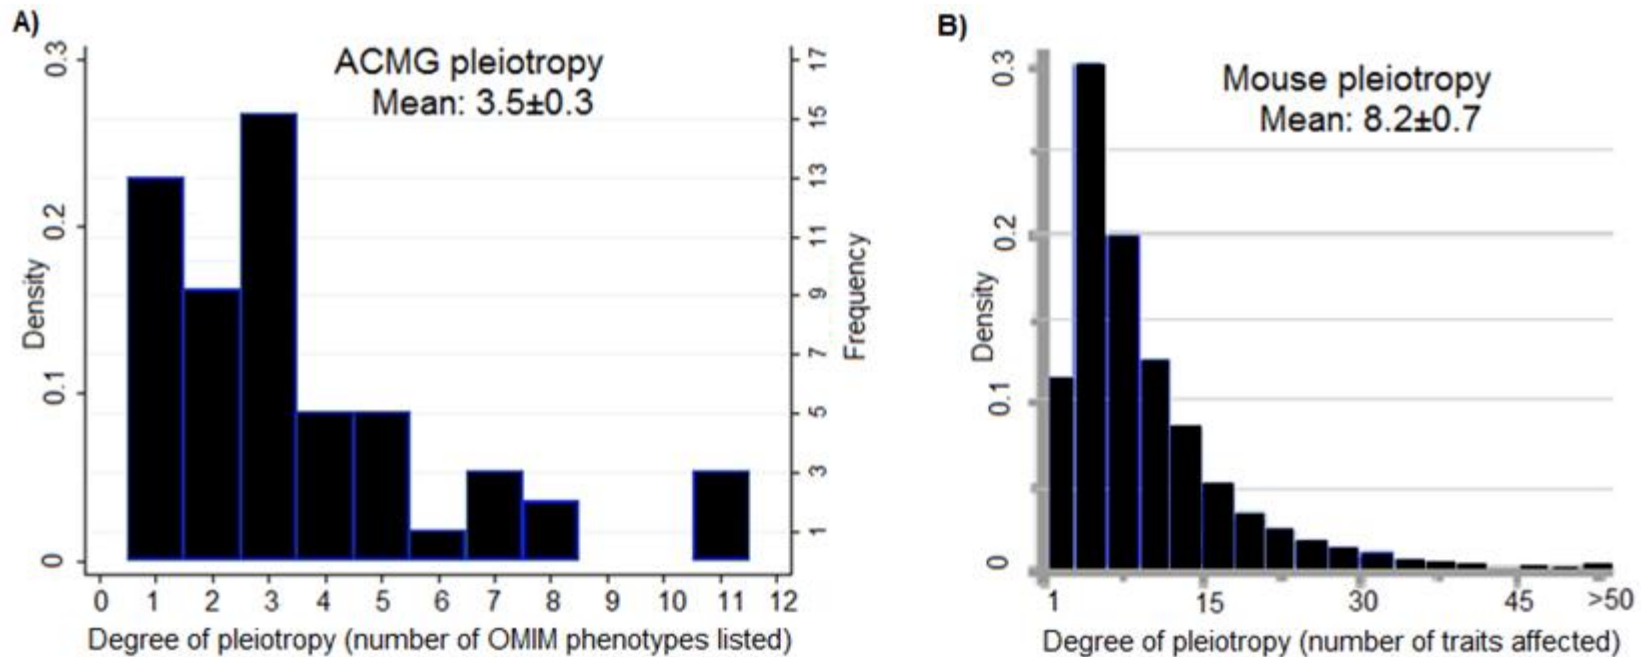

A) Number of unique MIM phenotypes associated with the 56 genes recommended for incidental return by the American College of Medical Genetics and Genomics. The number of MIM phenotypes (x-axis) for each gene was counted as the number of unique phenotype MIM numbers listed for each MIM gene given in the ACMG recommendations (mean =  $3.5 \pm 0.3$  phenotypes/gene). B) Frequency distribution of the degree of pleiotropy in a mouse knock-in/knock-down experiment, representing 4,915 genes and 308 traits (mean  $8.2 \pm 0.7$  phenotypes/gene). Figure B is modified from Wang et al. The distribution of pleiotropy observed in the ACMG recommendations is somewhat similar to the L-shaped distribution seen in the mouse experiment, suggesting that the distribution of pleiotropic relationships observed for these 56 genes could be representative of relationships that exist across the genome as a whole.

Wang Z, Liao BY, Zhang J. Genomic patterns of pleiotropy and the evolution of complexity. *Proceedings of the National Academy of Sciences of the United States of America*. 2010;107(42):18034-9. Epub 2010/09/30.
